# Supplementary material for: One-year change in health status and subsequent outcomes in COPD
Source: HighWire-hosted journal article supplement (doi:10.1136/thoraxjnl-2014-205697), 2015-03-17
Supplement: thoraxjnl-2014-205697supp_figures.pdf [file thoraxjnl-2014-205697supp_figures.pdf]

Figure E1-E3. Impact of one-year change in disease-specific health status on mortality, hospitalization and exacerbation, stratified for age (Figure E1), number of exacerbations during year 1 (Figure E2) and number of hospitalizations during year 1 (Figure E3).

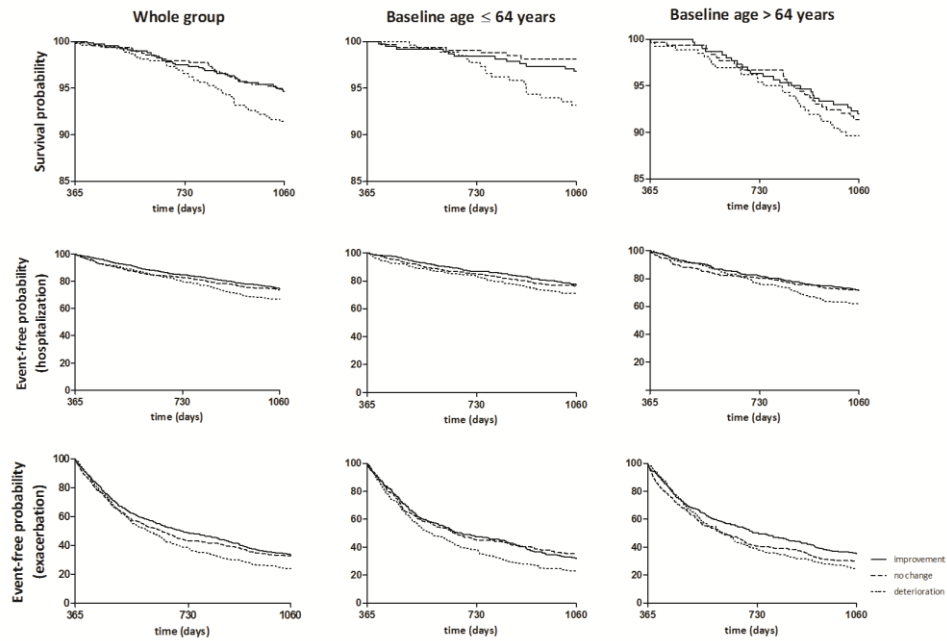

Figure E1.

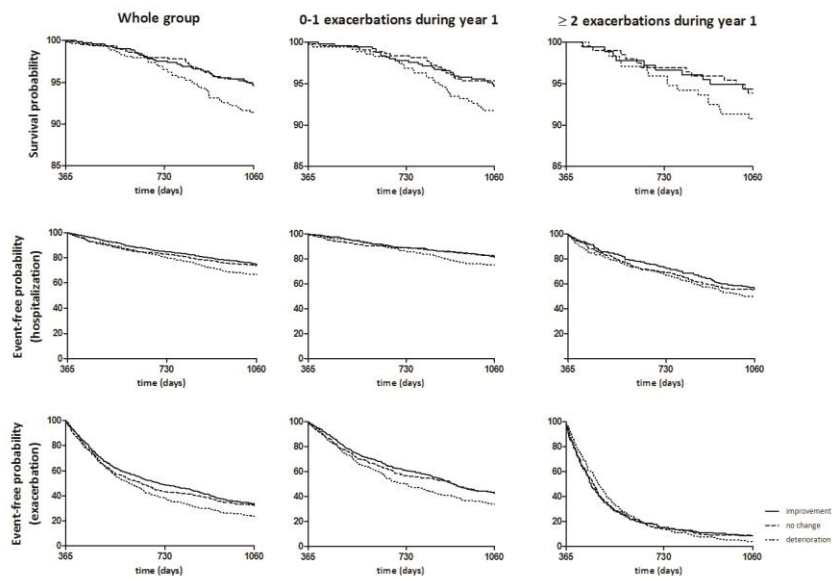

Figure E2.

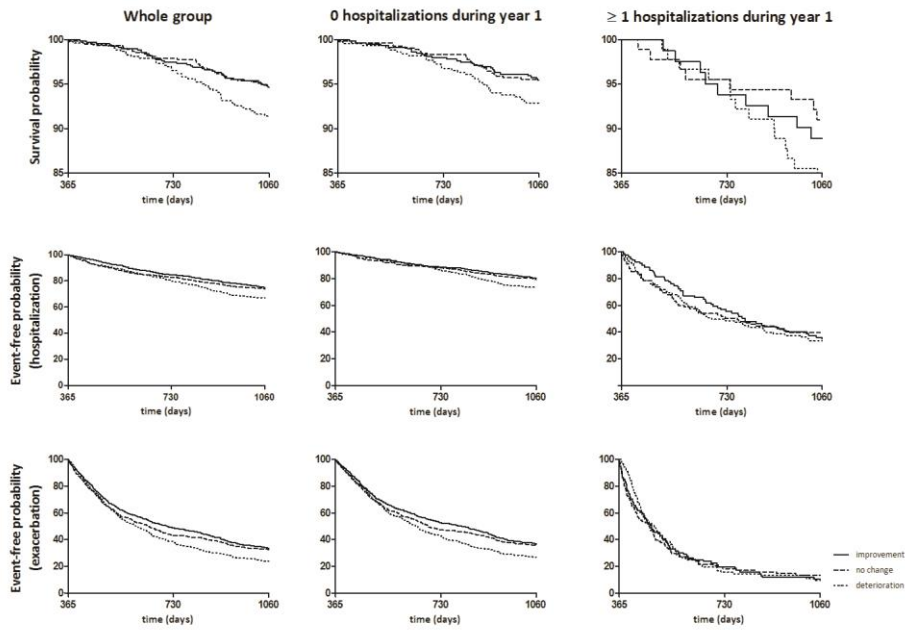

Figure E3.

Figure E4. Impact of one-year change in disease-specific health status as assessed with the SGRQ symptom, activity and impact domain on mortality, hospitalization and exacerbation.

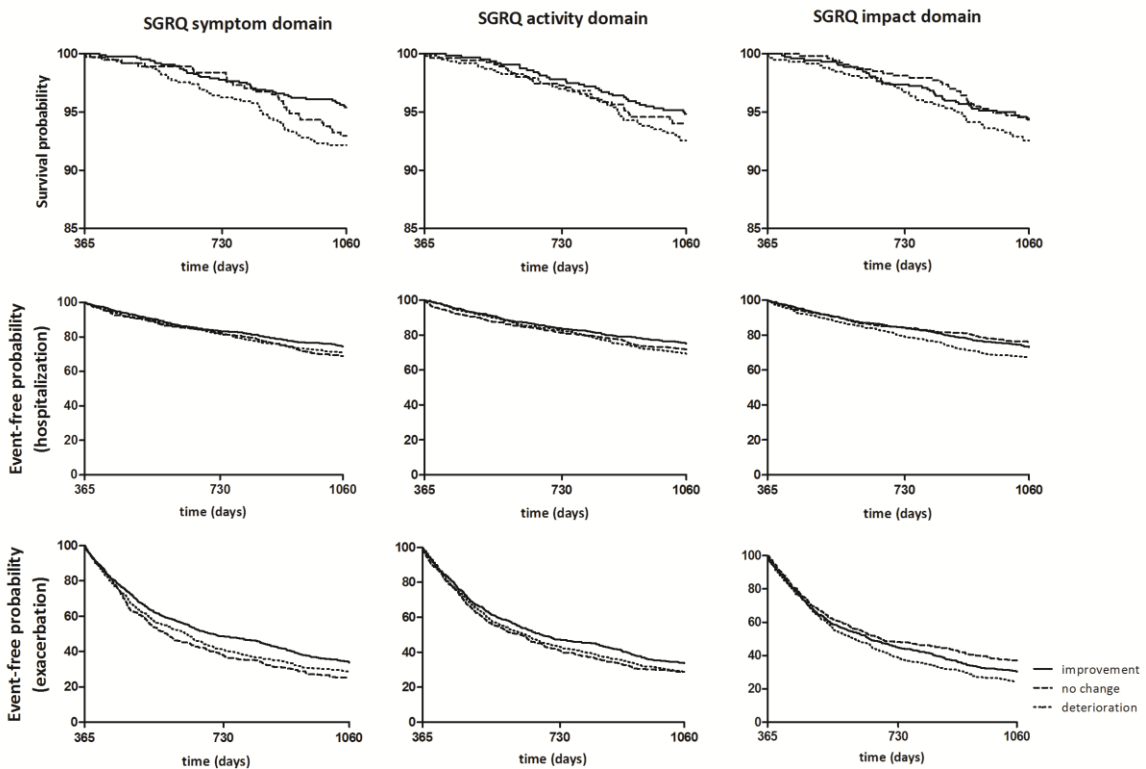

Figure E4.
